# Supplementary material
Source: publisher figshare collection journal article supplement (https://asha.figshare.com/articles/dataset/_/28664669)
Supplement: Supplementary file 1 [file 1]

**Supplemental Material S3.** Full results from the Descriptive IRT Model (1-PL IRT with random item effect).

The following tables show the random and fixed effects (Table S3-1), item difficulty estimates and their standard errors (Table S3-2), and person ability estimates and their standard errors from the best-fitting descriptive IRT model (i.e., 1-PL IRT with random item effect, as described in the paper). Model fit indices are displayed in Table S3-3.

Given that we previously reported IRT item and person parameter estimates for the VNT (see Fergadiotis et al., 2023) using the traditional fixed effect for items and with a different estimation method (weighted least squares mean- and variance-adjusted estimator), we additionally calculated and plotted correlations between item difficulty estimates (Figure S3-1) and person ability estimates (Figure S3-2) between the two studies to illustrate their comparability.

**Table S3-1**

*Random and Fixed Effects of the Descriptive IRT Model*

| Fixed Effects  | Estimate | Estimate     | SE <sup>a</sup> | z-statistic | p-value |
|----------------|----------|--------------|-----------------|-------------|---------|
|                | (Logit)  | (Odds Ratio) |                 |             |         |
| Intercept      | -0.184   | 0.832        | 0.260           | -0.71       | 0.478   |
| Random Effects |          | Variance     |                 |             |         |
| Person         | 2.141    |              |                 |             |         |
| Item           | 0.978    |              |                 |             |         |

*Note.* Transformation of parameter estimates from the logit scale to an odds ratio was calculated using the following formula: exp(logit).

<sup>a</sup>SE=standard error

**Table S3-2**

*Item Difficulty Estimates and Their Standard Errors*

| VNT Item         |             |          |                 |
|------------------|-------------|----------|-----------------|
| No. <sup>a</sup> | Target Verb | Estimate | SE <sup>b</sup> |
| 1                | cut         | -0.518   | 0.247           |
| 2                | bark        | -1.119   | 0.256           |

|    |         |        |       |
|----|---------|--------|-------|
| 3  | put     | 2.220  | 0.316 |
| 4  | send    | 0.392  | 0.249 |
| 5  | drive   | -0.862 | 0.251 |
| 6  | wash    | -0.713 | 0.249 |
| 7  | read    | 0.197  | 0.247 |
| 8  | laugh   | -1.624 | 0.271 |
| 9  | watch   | 0.798  | 0.251 |
| 10 | give    | 0.798  | 0.256 |
| 11 | swim    | -1.811 | 0.278 |
| 12 | stir    | 0.439  | 0.250 |
| 13 | pinch   | -0.232 | 0.246 |
| 14 | crawl   | 0.442  | 0.250 |
| 15 | deliver | 1.025  | 0.263 |
| 16 | pour    | 0.539  | 0.251 |
| 17 | howl    | 0.392  | 0.249 |
| 18 | throw   | 0.798  | 0.256 |
| 19 | bite    | -0.279 | 0.246 |
| 20 | shove   | -0.137 | 0.246 |
| 21 | tickle  | 0.343  | 0.249 |
| 22 | shave   | -0.924 | 0.253 |

*Note.* As with all IRT models specified using a logit distribution, higher values indicate greater item difficulty on the logit scale. As with item covariate effect estimates (see Table 4 in main text), item difficulty estimates are expressed on an “easiness” scale when specified using the *ranef* function from the *lme4* package in R (Bates et al., 2015), as opposed to the traditional “difficulty” scale of IRT models; as such, value signs were flipped to re-express estimates on the “difficulty” scale for ease of interpretation. Standard errors were obtained using the *se.ranef* function in the *arm* package of R (Gelman et al., 2022).

<sup>a</sup>No.=number

<sup>b</sup>SE=standard error

**Table S3-3**

*Person Ability Estimates and Their Standard Errors*

| Participant ID <sup>a</sup> | Estimate | SE <sup>b</sup> |
|-----------------------------|----------|-----------------|
| ACWT01a                     | -0.032   | 0.457           |
| ACWT02a                     | 1.178    | 0.486           |
| ACWT08a                     | -2.897   | 0.779           |
| ACWT09a                     | 1.178    | 0.486           |
| ACWT10a                     | -0.865   | 0.491           |
| ACWT11a                     | -0.432   | 0.468           |
| ACWT12a                     | 0.554    | 0.459           |
| adler01a                    | 0.358    | 0.455           |
| adler02a                    | -0.865   | 0.491           |
| adler10a                    | -0.432   | 0.468           |
| adler20a                    | -0.432   | 0.468           |
| BU01a                       | 1.944    | 0.558           |
| BU07a                       | -1.102   | 0.509           |
| cmu03a                      | 1.410    | 0.503           |
| elman02a                    | -1.36    | 0.533           |
| elman06a                    | -1.897   | 0.617           |
| elman08a                    | -2.897   | 0.779           |
| elman10a                    | 0.754    | 0.464           |
| elman11a                    | 0.961    | 0.473           |
| elman12a                    | 0.754    | 0.464           |
| elman14a                    | -0.865   | 0.491           |
| fridriksson02a              | 1.663    | 0.527           |
| fridriksson04a              | 1.944    | 0.558           |
| fridriksson05a              | 1.944    | 0.558           |
| fridriksson06a              | -0.643   | 0.477           |
| fridriksson07a              | 2.269    | 0.602           |
| fridriksson09a              | 0.163    | 0.455           |
| fridriksson12a              | 0.163    | 0.455           |
| fridriksson13a              | -0.432   | 0.468           |
| kansas09a                   | -0.865   | 0.491           |
| kansas11a                   | 1.663    | 0.527           |
| kansas13a                   | 0.358    | 0.455           |
| kansas15a                   | 0.358    | 0.455           |
| kansas16a                   | -2.897   | 0.779           |
| kansas17a                   | -0.032   | 0.457           |
| kansas23a                   | -1.649   | 0.565           |

|             |        |       |
|-------------|--------|-------|
| kempler02a  | 1.178  | 0.486 |
| kempler03a  | -0.229 | 0.461 |
| kempler04a  | -0.432 | 0.468 |
| scale01a    | -1.102 | 0.509 |
| scale04a    | 0.358  | 0.455 |
| scale06a    | 0.358  | 0.455 |
| scale08a    | 0.554  | 0.459 |
| scale13a    | -1.36  | 0.533 |
| scale20a    | 1.410  | 0.503 |
| scale23a    | 0.754  | 0.464 |
| scale24a    | -2.897 | 0.779 |
| scale28a    | -1.102 | 0.509 |
| scale30a    | -1.102 | 0.509 |
| scale31a    | -1.36  | 0.533 |
| scale33a    | 0.754  | 0.464 |
| scale38a    | -0.865 | 0.491 |
| STAR03a     | -1.36  | 0.533 |
| TAP04a      | 1.410  | 0.503 |
| TAP06a      | -2.382 | 0.676 |
| TAP07a      | -0.032 | 0.457 |
| TAP09a      | -2.337 | 0.683 |
| TAP11a      | -0.865 | 0.491 |
| TAP12a      | -0.229 | 0.461 |
| TAP13a      | -0.432 | 0.468 |
| TAP14a      | -1.102 | 0.509 |
| TAP17a      | -2.382 | 0.676 |
| TAP18a      | 0.163  | 0.455 |
| TAP19a      | -0.432 | 0.468 |
| TCU03a      | -0.865 | 0.491 |
| TCU05a      | 2.571  | 0.673 |
| TCU07a      | -1.360 | 0.533 |
| TCU08a      | -0.032 | 0.457 |
| thompson02a | 1.944  | 0.558 |
| thompson04a | 0.163  | 0.455 |
| thompson05a | 0.163  | 0.455 |
| thompson07a | 2.658  | 0.666 |
| thompson08a | 2.269  | 0.602 |
| thompson10a | 1.944  | 0.558 |
| thompson11a | -1.102 | 0.509 |
| thompson14a | 1.663  | 0.527 |

|               |        |       |
|---------------|--------|-------|
| tucson15a     | -0.865 | 0.491 |
| tucson20a     | -0.229 | 0.461 |
| tucson22a     | -0.032 | 0.457 |
| whiteside01a  | 0.961  | 0.473 |
| whiteside02a  | -1.102 | 0.509 |
| whiteside06a  | 0.358  | 0.455 |
| whiteside07a  | 1.663  | 0.527 |
| whiteside09a  | 1.663  | 0.527 |
| whiteside10a  | -0.643 | 0.477 |
| whiteside12a  | -1.102 | 0.509 |
| whiteside14a  | 0.163  | 0.455 |
| whiteside15a  | 0.163  | 0.455 |
| whiteside17a  | 1.663  | 0.527 |
| williamson02a | 1.944  | 0.558 |
| williamson03a | -1.360 | 0.533 |
| williamson04a | 0.358  | 0.455 |
| williamson12a | -0.032 | 0.457 |
| williamson14a | 0.358  | 0.455 |
| williamson15a | 0.358  | 0.455 |
| williamson18a | 1.178  | 0.486 |
| williamson19a | -0.032 | 0.457 |
| williamson21a | -2.382 | 0.676 |
| wozniak02a    | 1.590  | 0.533 |
| wozniak03a    | -0.229 | 0.461 |
| wozniak05a    | 0.163  | 0.455 |
| wozniak07a    | -0.432 | 0.468 |
| wright201a    | 0.163  | 0.455 |
| wright202a    | 1.663  | 0.527 |
| wright203a    | 0.754  | 0.464 |
| wright204a    | 0.554  | 0.459 |
| wright206a    | -0.865 | 0.491 |

*Note.* As with all IRT models specified using a logit distribution, higher values indicate amount of the latent ability (verb naming) on the logit scale. Item ability estimates were obtained using the *ranef* function from the *lme4* package in R (Bates et al., 2015), and standard errors were obtained using the *se.ranef* function in the *arm* package of R (Gelman & Su, 2022).

<sup>a</sup>ID=identifier

<sup>b</sup>SE=standard error

### Figure S3-1

*Correlation between VNT Item Difficulty Estimates from Fergadiotis et al. (2023) and the Present Study*

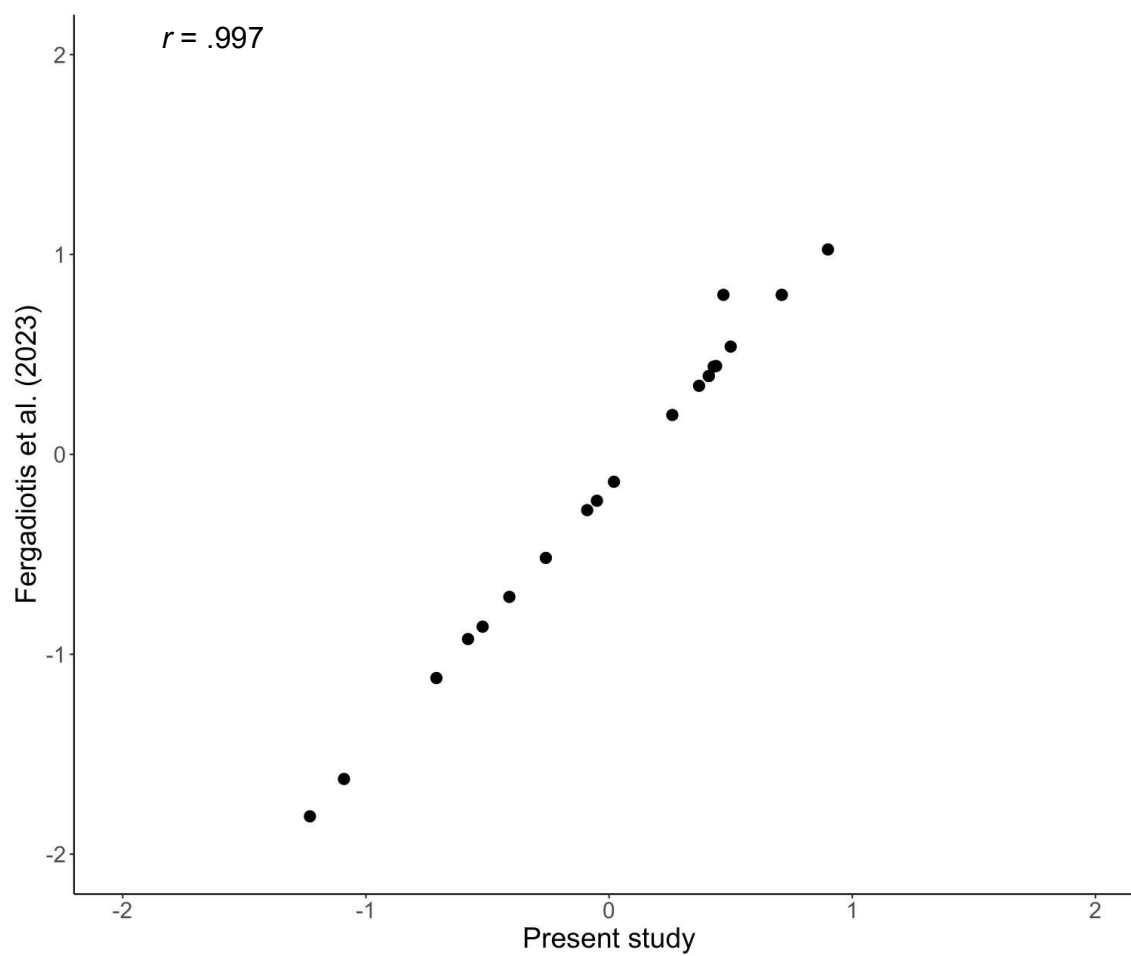

## Figure S3-2

*Correlation between VNT Person Ability Estimates from Fergadiotis et al. (2023) and the Present Study*

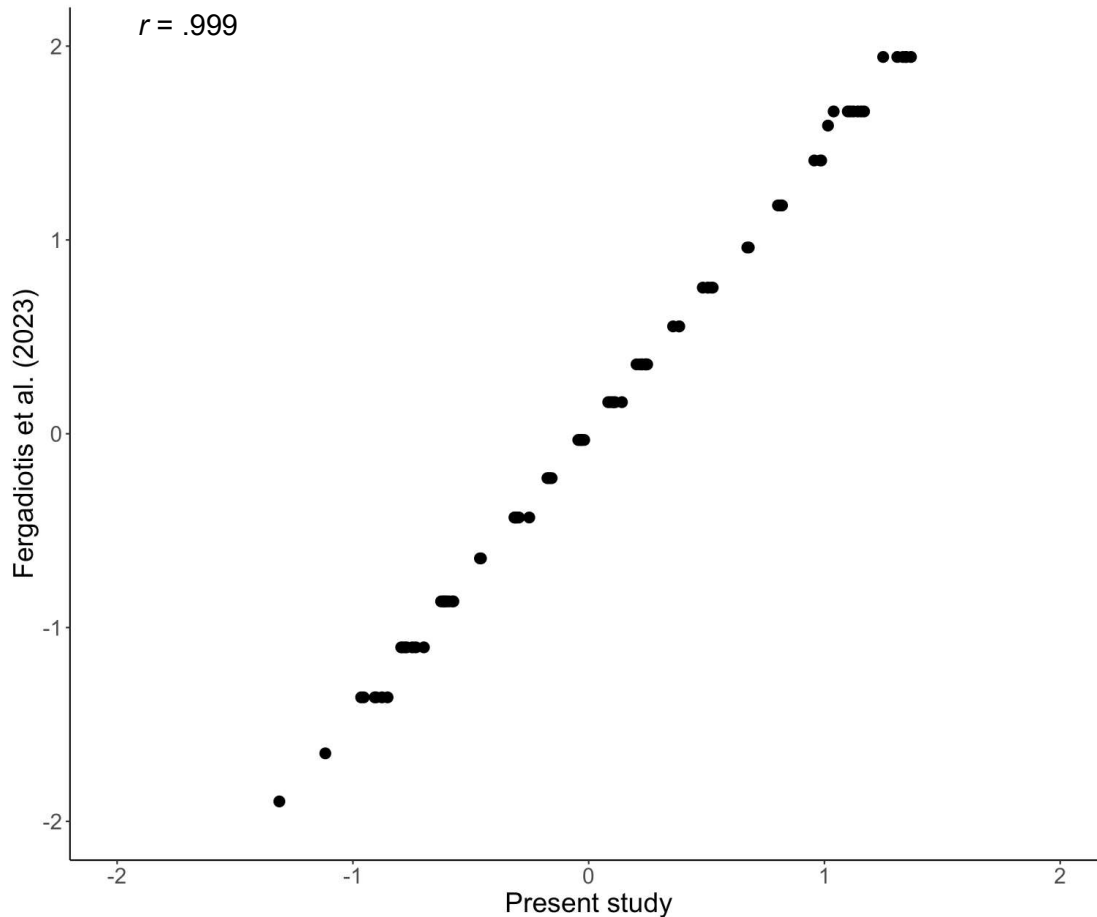

## References

- Bates, D., Mächler, M., Bolker, B., & Walker, S. (2015). Fitting linear mixed-effects models using lme4. *Journal of Statistical Software*, 67, 1–48.
- Fergadiotis, G., Casilio, M., Dickey, M. W., Steel, S., Nicholson, H., Fleegle, M., Swiderski, A., & Hula, W. D. (2023). Item response theory modeling of the Verb Naming Test. *Journal of Speech, Language, and Hearing Research*, 66(5), 1718–1739.
- Gelman, A., Su, Y.-S., Yajima, M., Hill, J., Pittau, M. G., Kerman, J., Zheng, T., Dorie, V., & Su, M. Y.-S. (2022). *Package 'arm.'* <http://cran.stat.unipd.it/web/packages/arm/arm.pdf>
