# Supplementary material
Source: publisher figshare collection journal article supplement (https://asha.figshare.com/articles/dataset/_/28664669)
Supplement: Supplementary file 2 [file 1]

#### **Supplemental Material S4.** Preliminary explanatory IRT model and results using common item covariates.

In the process of arriving at the final explanatory IRT model of the present study, we first fit an initial LLTM (i.e., explanatory IRT model with only item covariates) with traditional item covariates known to be predictive of a common test of confrontation naming for noun production (see Fergadiotis et al., 2019 for further detail). This was done to confirm that these item covariates were sufficiently controlled for in the VNT test design, as intended by the test developers (Cho-Reyes & Thompson, 2012). This LLTM model included the following variables: lexical frequency, as measured by the log 10 contextual diversity index (Brysbaert & New, 2009); age of acquisition (Kuperman et al., 2012); and phoneme length. All item covariates were extracted from the South Carolina Psycholinguistic Metabase (Gao et al., 2022) and are included as part of Supplementary Materials S1.

Here, we interpreted age of acquisition as reflecting lexical-semantic processing, given observed effects in a wide range of lexical tasks (e.g., Johnston & Barry, 2005, although see Fergadiotis et al., 2019 for an overview of other processes that may be involved); phoneme length as reflecting phonological processing (e.g., Gollan & Brown, 2006; James & Burke, 2000; Meyer & Bock, 1992); and lexical frequency as reflecting both lexical-semantic and phonological processing (Kittredge et al., 2008).

As can be seen in Table S4-1, model fit indices revealed that a model with lexical frequency, age of acquisition, and phoneme length was not significantly different than one without the item covariates ( $p = .547$ ), and these variables explained only a marginal amount of the variance in item difficulty parameters ( $R^2 = .098$ ). Given the more parsimonious model demonstrated an equivalent fit to the data, fixed and random effects were not evaluated.

**Table S4-1**

*Model Fit Indices for the Descriptive IRT Model and Preliminary LLTM Models*

| Model                                                  | Number of<br>Parameter<br>s | AIC    | BIC    | Log<br>Likelihood | Deviance | LRT            |                |                | Item<br>R <sup>2</sup> |
|--------------------------------------------------------|-----------------------------|--------|--------|-------------------|----------|----------------|----------------|----------------|------------------------|
|                                                        |                             |        |        |                   |          | $\chi^2$       | <i>df</i>      | <i>p</i>       |                        |
| 1-PL IRT with random<br>item effect                    | 3                           | 2608.7 | 2626.0 | -1301.3           | 2602.7   | — <sup>a</sup> | — <sup>a</sup> | — <sup>a</sup> | — <sup>a</sup>         |
| LLTM with Fergadiotis et<br>al. (2019) item covariates | 6                           | 2612.6 | 2647.1 | -1300.3           | 2600.6   | 2.12           | 3              | .547           | .098                   |

<sup>a</sup>Not applicable

**References**

- Brysbaert, M., & New, B. (2009). Moving beyond Kučera and Francis: A critical evaluation of current word frequency norms and the introduction of a new and improved word frequency measure for American English. *Behavior Research Methods*, 41(4), 977–990.
- Cho-Reyes, S., & Thompson, C. K. (2012). Verb and sentence production and comprehension in aphasia: Northwestern Assessment of Verbs and Sentences (NAVS). *Aphasiology*, 26(10), 1250–1277.
- Fergadiotis, G., Swiderski, A., & Hula, W. D. (2019). Predicting confrontation naming item difficulty. *Aphasiology*, 33(6), 689–709.
- Gao, C., Shinkareva, S. V., & Desai, R. H. (2023). SCOPE: The South Carolina psycholinguistic metabase. *Behavior Research Methods*, 55, 2853–2884.
- Gollan, T. H., & Brown, A. S. (2006). From tip-of-the-tongue (TOT) data to theoretical implications in two steps: When more TOTs means better retrieval. *Journal of Experimental Psychology: General*, 135(3), 462–483.

- James, L. E., & Burke, D. M. (2000). Phonological priming effects on word retrieval and tip-of-the-tongue experiences in young and older adults. *Journal of Experimental Psychology: Learning, Memory, and Cognition*, 26(6), 1378–1391.
- Johnston, R. A., & Barry, C. (2005). Age of acquisition effects in the semantic processing of pictures. *Memory & Cognition*, 33(5), 905–912.
- Kittredge, A. K., Dell, G. S., Verkuilen, J., & Schwartz, M. F. (2008). Where is the effect of frequency in word production? Insights from aphasic picture-naming errors. *Cognitive Neuropsychology*, 25(4), 463–492.
- Kuperman, V., Stadthagen-Gonzalez, H., & Brysbaert, M. (2012). Age-of-acquisition ratings for 30,000 English words. *Behavior Research Methods*, 44(4), 978–990.
- Meyer, A. S., & Bock, K. (1992). The tip-of-the-tongue phenomenon: Blocking or partial activation? *Memory & Cognition*, 20(6), 715–726.
